# Supplementary material for: Intranasal monoclonal antibodies do not prevent respiratory infection in a randomized, controlled experimental infection trial
Source: Research Square preprint supplement (doi:10.21203/rs.3.rs-5850925/v1), 2025-01-23
Supplement: Supplementary file 1 [file 582214a8249b7043f4f65512.pdf]

# Supplementary Materials

Supplement to: J. Terstappen et al., 2025. Intranasal monoclonal antibodies do not prevent respiratory infection in a randomized, controlled experimental infection trial. *Npj Drug Discovery*.

This appendix has been provided by the authors to give readers additional information about the work.

## Table of Contents

|                                                                           |                                            |
|---------------------------------------------------------------------------|--------------------------------------------|
| Section S1: Intranasal antibodies to prevent respiratory infections ..... | 3                                          |
| Section S2: Methods .....                                                 | 7                                          |
| Sample size selection.....                                                | <b>Fout! Bladwijzer niet gedefinieerd.</b> |
| Study design .....                                                        | <b>Fout! Bladwijzer niet gedefinieerd.</b> |
| Real-Time Quantitative Polymerase Chain Reaction (RT-qPCR).....           | <b>Fout! Bladwijzer niet gedefinieerd.</b> |
| Tissue Culture Half Infectious Dose (TCID50) Assay .....                  | <b>Fout! Bladwijzer niet gedefinieerd.</b> |
| Symptom scores.....                                                       | <b>Fout! Bladwijzer niet gedefinieerd.</b> |
| Safety reporting .....                                                    | <b>Fout! Bladwijzer niet gedefinieerd.</b> |
| Lung function quality scores .....                                        | <b>Fout! Bladwijzer niet gedefinieerd.</b> |
| Section S3: Supplementary Tables and Figures .....                        | 7                                          |
| References.....                                                           | 13                                         |

## Section S1: Intranasal antibodies to prevent respiratory infections

| Candidate                    | Description                        | Latest development           | Studies                                                                                                  |                                                                   |                                 |                                                                                                                                                   |                    |
|------------------------------|------------------------------------|------------------------------|----------------------------------------------------------------------------------------------------------|-------------------------------------------------------------------|---------------------------------|---------------------------------------------------------------------------------------------------------------------------------------------------|--------------------|
|                              |                                    |                              | Study design                                                                                             | Dose                                                              | Administration                  | Results                                                                                                                                           | Trial registration |
| F61                          | mAb (IgG1) neutralizing SARS-CoV-2 | Phase 1 and real-world study | Mice model: placebo-controlled challenge study                                                           | Single dose of 5-20 mg/kg two hours before challenge              | Drops; 50 µL                    | Prophylactic effect observed for range of SAR-CoV-2 variants at 20 mg/kg dose <sup>1</sup>                                                        | N.A.               |
|                              |                                    |                              | Randomized, double-blind, placebo-controlled trial; n=2008 healthy adults; 7 day follow-up               | Single or daily dose of 24 mg                                     | Spray; 0·8mL/dose               | Laboratory confirmed efficacy at day 7 was 3·8% in the one-dose cohort and 72·2% in the multiple dose cohort <sup>2</sup>                         | <sup>3,4</sup>     |
| Palivizumab                  | mAb (IgG1) neutralizing RSV        | Phase 1/2b                   | Mice model: challenge study                                                                              | Single dose of 0·005-0·5 mg/kg one to seven days before challenge | Drops; 50 µL                    | Intranasal palivizumab protected mice against RSV infection in a dose-dependent manner and this protection lasted at least 1 week <sup>5</sup>    | N.A.               |
|                              |                                    |                              | Randomized, double-blind, placebo-controlled trial; n=268 healthy late-preterm infants; 1 year follow-up | Daily dose of 50 µg palivizumab (1 mg/mL) per nostril             | Drops; 50 µL/dose               | Any RSV infection in infants in palivizumab arm (18/47 (38·3%)) was similar to placebo arm (11/47 (23·4%)); aOR 2·2, 95% CI 0·7–6·5) <sup>6</sup> | <sup>7,8</sup>     |
| BI-767551<br><i>DZIF-10c</i> | mAb (IgG1) neutralizing SARS-CoV-2 | Phase 1/2a                   | Mice model: isotype-controlled challenge study                                                           | Single dose of 40 mg/kg one day before challenge                  | Drops; max 30 µL into the lungs | No infection in the prophylactically treated arm versus high infectious titers in the isotype-controlled arm <sup>9</sup>                         | N.A.               |
|                              |                                    |                              | Open-label dose escalation trial rolled-over into randomized placebo-                                    | ..                                                                | Inhalation                      | ..                                                                                                                                                | <sup>10</sup>      |

|                           |                                              |         |                                                                                                  |                                                                                                                                                                                                                                                                                                                              |                                                                                   |                                                                                                                                                                                                                                                                                                   |                                            |
|---------------------------|----------------------------------------------|---------|--------------------------------------------------------------------------------------------------|------------------------------------------------------------------------------------------------------------------------------------------------------------------------------------------------------------------------------------------------------------------------------------------------------------------------------|-----------------------------------------------------------------------------------|---------------------------------------------------------------------------------------------------------------------------------------------------------------------------------------------------------------------------------------------------------------------------------------------------|--------------------------------------------|
|                           |                                              |         | controlled expansion cohort;<br>n=45 healthy adults                                              |                                                                                                                                                                                                                                                                                                                              |                                                                                   |                                                                                                                                                                                                                                                                                                   |                                            |
| 35B5                      | mAb (IgG1)<br>neutralizing SARS-CoV-2        | Phase 1 | Pharmacokinetic study; n=30<br>healthy adults                                                    | Single dose of 1 mg/mL                                                                                                                                                                                                                                                                                                       | Spray; volume<br>unknown.                                                         | Single dose of 35B5 conveys ex-<br>vivo neutralization of SARS-CoV-2<br>variants at least 24 hours after<br>administration <sup>11</sup> .                                                                                                                                                        | Clinical trial<br>registration<br>missing. |
| IGM-6268<br><i>IgM-14</i> | mAb (IgM)<br>neutralizing SARS-CoV-2         | Phase 1 | Mice model: Isotype-<br>controlled challenge study                                               | Single dose of 0.044-<br>3.5 mg/kg six hours<br>before challenge                                                                                                                                                                                                                                                             | Drops; 40-50 µL                                                                   | Enhanced potency of IgM over IgG<br>confirmation. Lung viral load after<br>challenge reduced at least 5-fold<br>compared to isotype arm <sup>12,13</sup>                                                                                                                                          | N.A.                                       |
|                           |                                              |         | Two randomized, double-<br>blind, placebo-controlled<br>trials; n=54 and 26; 60 day<br>follow-up | 1.7-5 mg once or twice<br>per day for 5 days                                                                                                                                                                                                                                                                                 | Atomizer                                                                          | Both trials were terminated by<br>sponsor decision                                                                                                                                                                                                                                                | <sup>14,15</sup>                           |
| RBD IgY                   | Chicken-derived<br>IgY binding<br>SARS-CoV-2 | Phase 1 | Mice and hamster model:<br>placebo-controlled challenge<br>study; 3-4 day follow-up              | Mice: Single dose of 2<br>mg (100 mg/kg) 30<br>minutes before<br>challenge.<br>Hamsters: 1.7 mg<br>(0.017 mg/kg) one day<br>before challenge and<br>twice daily for five days<br>after challenge<br>Syrian golden hamsters:<br>100 µL of 1 mg/50 mL<br>of the 20 mg/mL<br>solution per nares four<br>hours before challenge. | Mice: 0.1 mL<br>Hamsters: volume<br>unknown.<br>Syrian golden<br>hamsters: 100 µL | Mice: >100-fold reduction in viral<br>RNA in lungs and trachea compared<br>with placebo <sup>16</sup> . Hamsters: RBD<br>IgY treatment protected against<br>significant weight loss and reduced<br>viral load <sup>17</sup> . Syrian golden<br>hamsters: No <i>in vivo</i> efficacy <sup>18</sup> | N.A.                                       |

|                           |                                                        |                                 |                                                                                               |                                                                         |                       |                                                                                                                                         |                               |
|---------------------------|--------------------------------------------------------|---------------------------------|-----------------------------------------------------------------------------------------------|-------------------------------------------------------------------------|-----------------------|-----------------------------------------------------------------------------------------------------------------------------------------|-------------------------------|
|                           |                                                        |                                 | Randomized, double-blind, placebo-controlled trial; n=48; 21 day follow up                    | 2-8 mg once, twice or three times daily (total daily dose 2-24 mg)      | Drops; 100 µL/drop    | Similar safety events between RBD IgY and placebo groups <sup>18</sup>                                                                  | <sup>19</sup>                 |
| HH-120                    | IgM-like ACE2 fusion protein neutralizing SARS-CoV-2   | Clinical trial of unknown phase | Single arm clinical trial; n=14. Randomized, single-blinded, placebo-controlled trial; n=268  | 5-8 doses of 2 mg/dose per day for three consecutive days post-exposure | Spray; 0.2 mL         | Well tolerated and reduced the risk of SARS-CoV-2 infection in individuals with varying levels of exposure to the virus <sup>20</sup> . | <sup>21,22</sup>              |
| IgG1 Antibody cocktail    | Human mAb cocktail (IgG1) against SARS-CoV-2           | Clinical trial of unknown phase | Randomized, double-blind, placebo-controlled trial; n=36; 14 day follow up                    | 2 doses per nostril, three times daily for 7 days                       | Spray; volume unknown | ..                                                                                                                                      | <sup>23</sup>                 |
| MY-586                    | SARS-CoV-2 nAb                                         | Clinical trial of unknown phase | Randomized, double-blind, placebo-controlled trial; n=72; 1 year follow up                    | 5 mg/mL; different doses and intervals                                  | Spray; volume unknown | ..                                                                                                                                      | <sup>24</sup>                 |
| CR9114<br><i>PanFlu</i>   | Pan-influenza mAb targeting H5 hemagglutinin           | Mice model                      | Mice model: placebo controlled challenge study in naïve and immunized mice; 21 days follow-up | Single dose of 0.2-5 mg/kg 24 hours before challenge                    | 100 µL                | Complete reduction of weight loss and mortality in both dose groups compared with placebo <sup>25</sup> .                               | N.A.                          |
|                           |                                                        |                                 | Randomized, placebo-controlled dose escalation trial; n=75                                    | ..                                                                      | ..                    | ..                                                                                                                                      | Trial announced <sup>26</sup> |
| TriSb92<br><i>Covidin</i> | Trimeric antibody-mimetic shepabody against SARS-CoV-2 | Mice model                      | Open-label untreated-controlled challenge study; n=22; 2 day follow-up                        | Single dose of 5-50 µg (0.250-2.50 mg/kg) 1-8 hours before challenge.   | Drops; 50 µL          | Reduction in viral RNA in lung tissue compared with untreated controls <sup>27</sup> .                                                  | N.A.                          |
| WKS13                     | mAb (IgG1) neutralizing SARS-CoV-2                     | Hamster model                   | Mock-controlled challenge study; n=44; 4 day follow-up                                        | Single dose of 500 µg (5 mg/kg) one day before challenge                | Drops; 100 µL         | Significantly lower infectious viral titers in lung and nasal wash                                                                      | N.A.                          |

|                               |                                              |              |                                                                 |                                                                     |                                     |                                                                                                                   |      |
|-------------------------------|----------------------------------------------|--------------|-----------------------------------------------------------------|---------------------------------------------------------------------|-------------------------------------|-------------------------------------------------------------------------------------------------------------------|------|
|                               |                                              |              |                                                                 |                                                                     |                                     | samples compared with control group <sup>28</sup> .                                                               |      |
| Anti-RSV Ig                   | Hyper-enriched anti-RSV IgG                  | Mice model   | Isotype-controlled challenge study; n=8; 4-day follow-up.       | Single dose of 0.1 or 1 mg/kg one day before challenge              | 50 µL                               | Full protection against RSV replication in the lungs with high dose and some protection at low dose <sup>29</sup> | N.A. |
| EU126-M2<br><i>Invisimask</i> | SARS-CoV-2                                   | Mice model   | Untreated-controlled challenge study; 7-day follow-up.          | Single dose of 25-200 µg (1.25-10 mg/kg) 10 hours before challenge* | 40 mL*                              | Significant reductions in virus detection in both nose and lung areas 7 days after virus dosing <sup>30*</sup>    | N.A. |
| M336                          | mAb (IgG1) neutralizing MERS-CoV             | Rabbit model | Ig-controlled challenge study; 1-3-day follow-up.               | Single dose of 1-10 mg/kg one day before challenge                  | 0.2-2 mL                            | > 1000-9000 fold reduction in viral RNA titers compared with controls <sup>31</sup>                               | N.A. |
| 6F12                          | mAbs neutralizing influenza HA               | Mice model   | Ig-controlled challenge study; 14-day follow-up.                | Single dose of 0.3-3 mg/kg 2-120 hours before challenge             | Droplets or aerosol; volume unknown | Local administration is superior to systemic administration in a prophylaxis regimen <sup>32</sup> .              | N.A. |
| Mab 62                        | mAb (IgG1) neutralizing influenza H7 strains | Mice model   | Mock-controlled challenge study; n=20; 14-day follow-up.        | Single dose of 2.5-10 mg/kg one day before challenge.               | 100 µL                              | Immunization with 2.5 mg/kg was sufficient for full protection against weight loss and mortality <sup>33</sup> .  | N.A. |
| DPJY01                        | mAb (IgA) neutralizing influenza H5 strains  | Mice model   | Isotype- and mock-controlled challenge study, 14-day follow-up. | Single dose of 10-50 mg/kg 24-72 hours before challenge             | Drops; 50 µL                        | Full protection against mortality with 50 mg/kg 24-72 hours before challenge <sup>34</sup> .                      | N.A. |

**Table S1. Intranasal mAbs in development to prevent respiratory infections.**

Summary of mAbs in development for mucosal administration in the last 15 years to prevent respiratory infections. mAbs are ordered by development stage and then by publication year. If antibody dosing in animal models was not expressed as mg/kg, we calculated it assuming a mouse weighs 20 grams and a hamster weighs 100 grams. \*study was not peer-reviewed as it was only published on bioRxiv. Abbreviations: aOR, adjusted odds ratio; Ig, immunoglobuline; mAb, monoclonal antibody; MERS-CoV, Middle-Eastern respiratory syndrome coronavirus; N.A., not applicable; nAb, neutralizing antibody; RBD, receptor binding domain; RNA, ribonucleic acid; RSV; respiratory syncytial virus; SARS-CoV-2, severe acute respiratory syndrome coronavirus 2; .., not available.

Section S2: Supplementary Tables and Figures

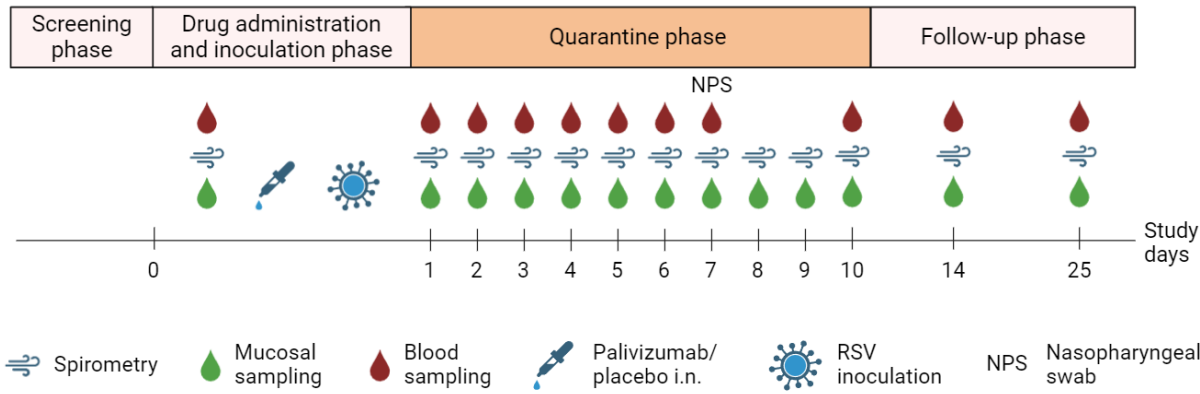

Fig. S1. Study Design.

After screening, participants were randomized 1:1 to palivizumab or placebo group (n=14 per group). Predose sampling included nasal and blood sampling as well as spirometry. One hour after drug administration, participants were challenged with 10<sup>4</sup> PFU of RSV-A Memphis 37b and released for home-quarantine. During home-quarantine, participants logged their symptoms and temperature daily in symptom diaries. Research personnel performed daily home-visits for sample collection and spirometry. On day 7, participants were released from quarantine if their nasal pharyngeal swab tested negative on RSV. (Serious) adverse events were monitored throughout the entire study duration. i.n., intranasal; NPS, nasopharyngeal swab; PFU, plaque-forming unit; RSV, respiratory syncytial virus. Figure was created using Biorender.com.

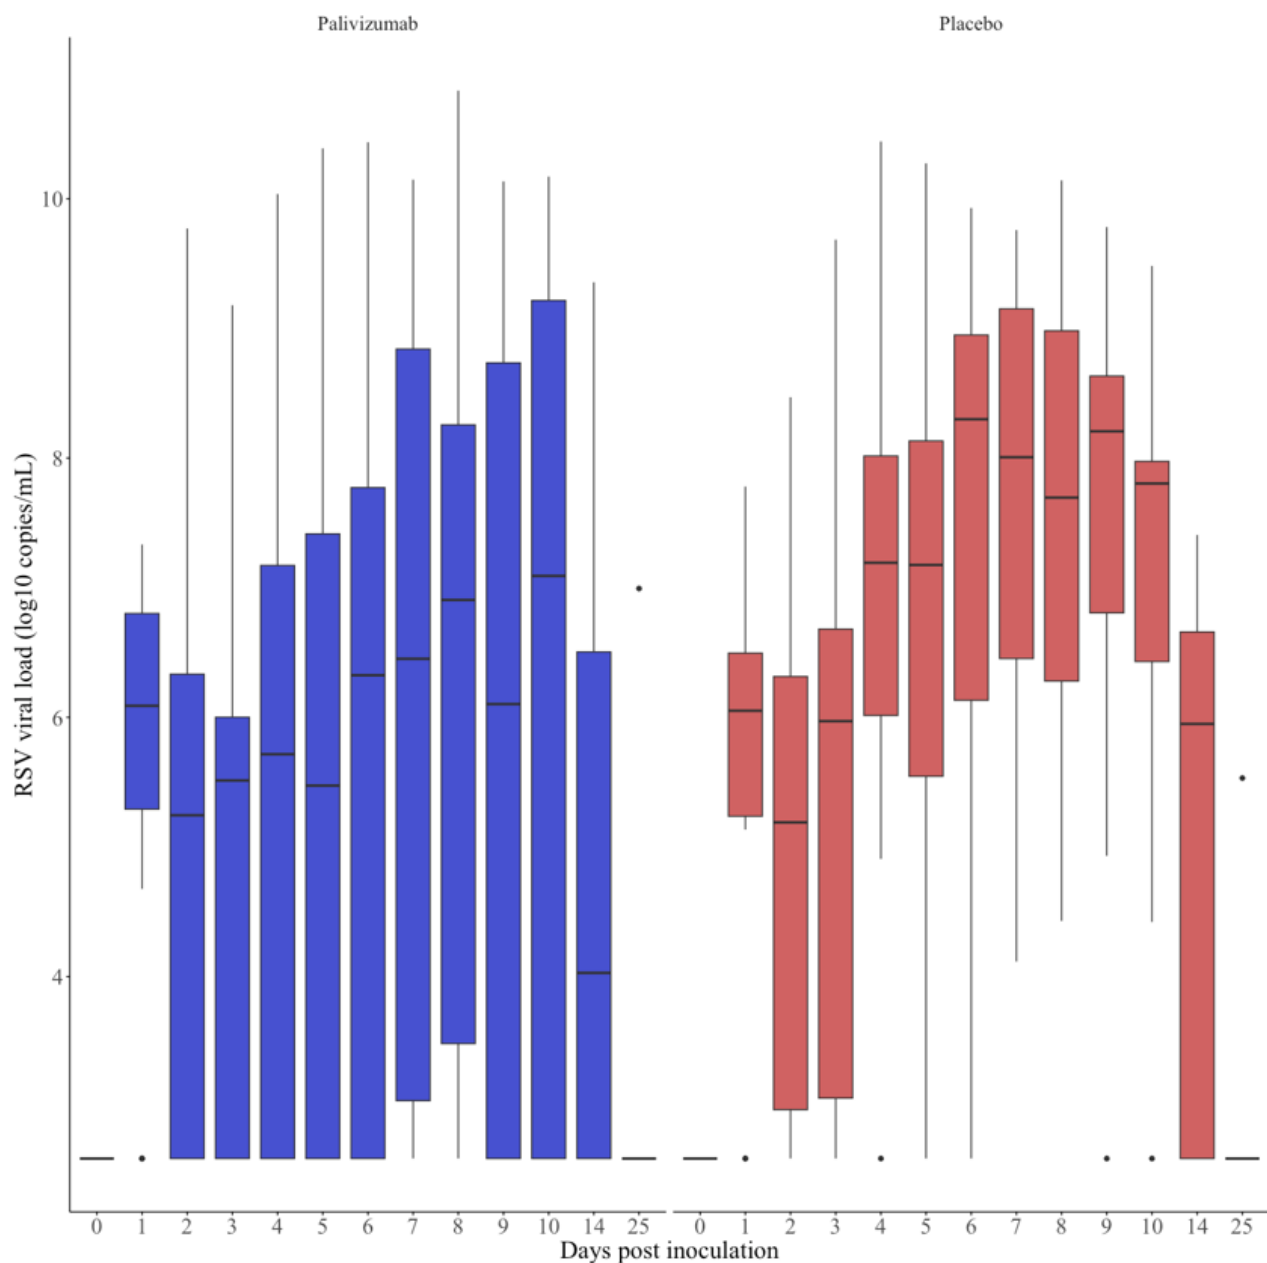

**Fig S2. Boxplot of RSV viral copies/mL over time per treatment group.**

The boxes in the plots represent the interquartile range (IQR), with the median marked by a line inside the box. The whiskers extend from the box to the minimum and maximum values. Outliers are depicted as individual points beyond the whiskers.



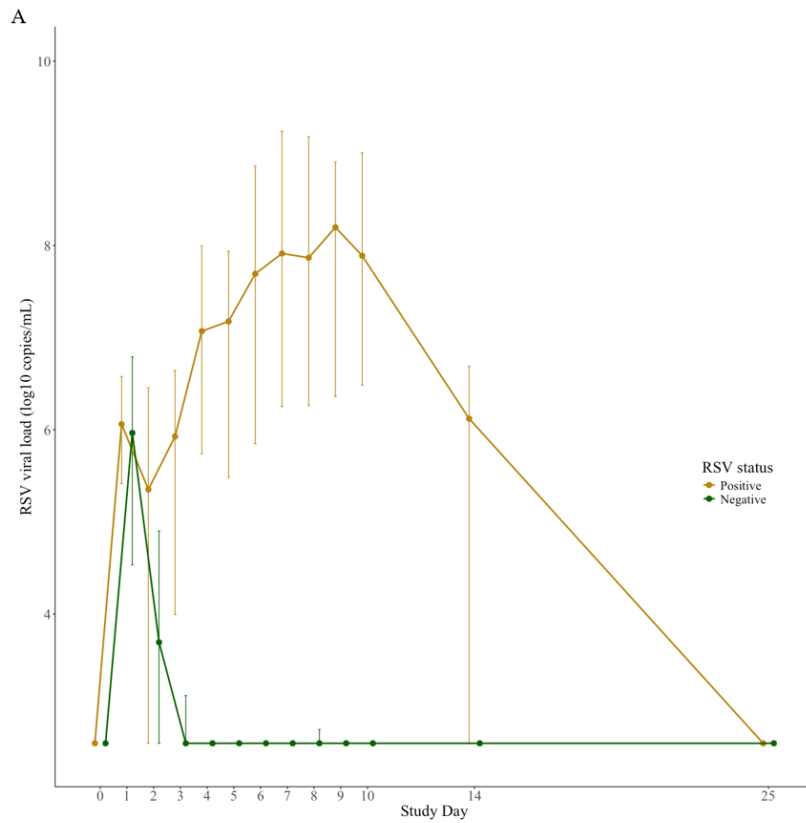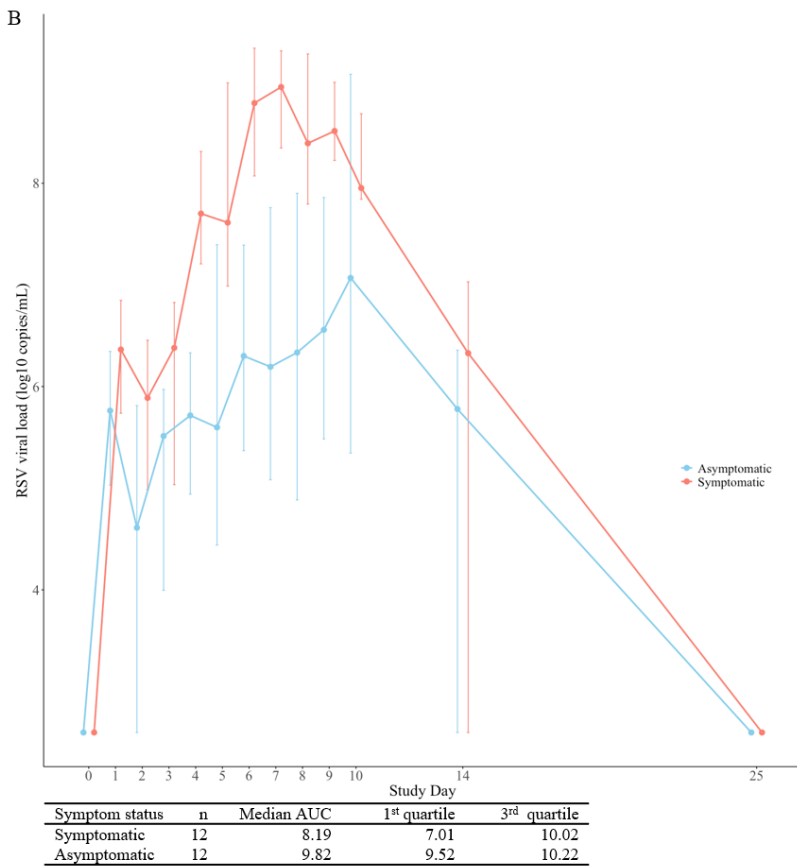

**Fig. S3. Viral load per RSV and symptom status**

Viral load per RSV and symptom status. Descriptive statistics of RSV copies/mL (log<sub>10</sub>) area under the curve from day 2-14 per treatment group are provided in the table. **A.** Viral load (median + IQR) over time for RSV positive and negative participants. **B.** Viral load (median + IQR) over time of symptomatic and asymptomatic RSV positive participants.

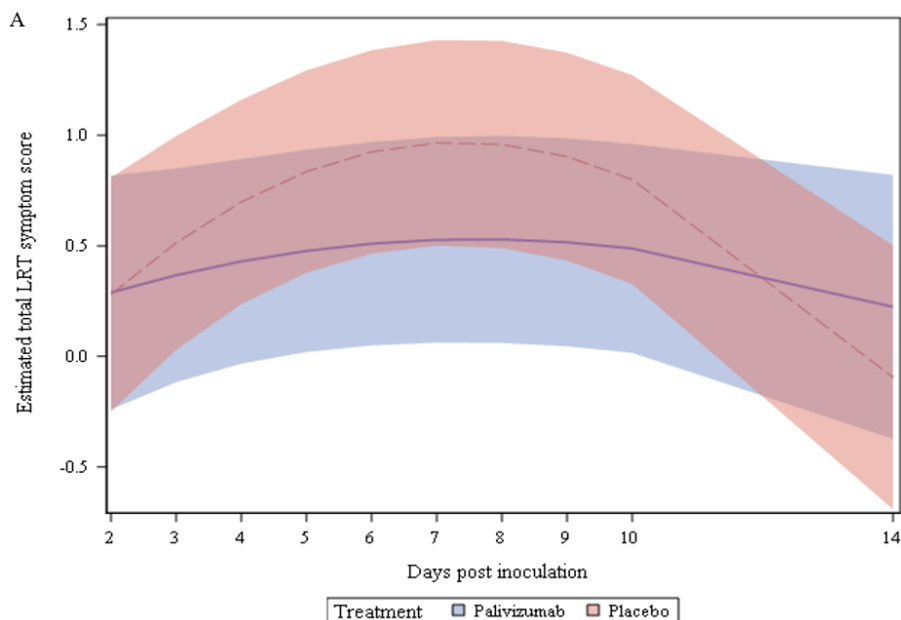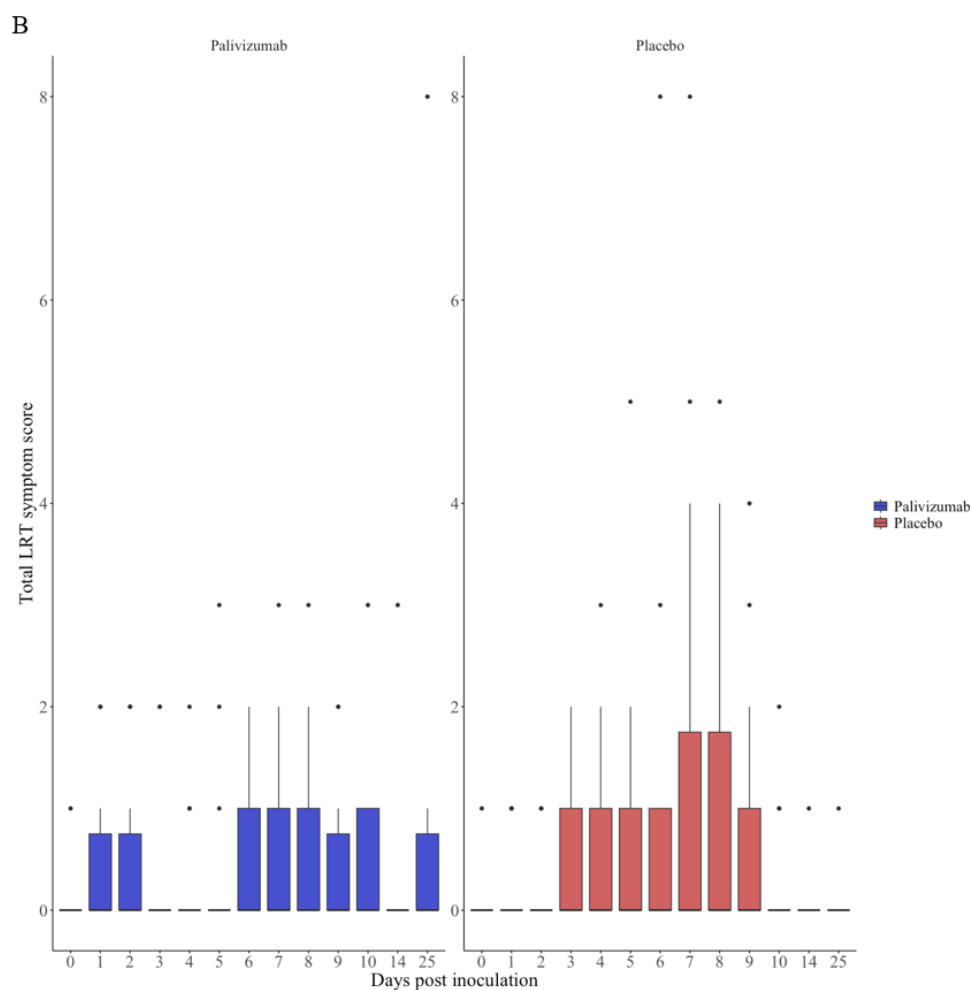

**Fig. S4. Lower respiratory tract symptoms after RSV challenge**

**A.** Mean estimates of regression model for lower respiratory tract symptom score on days 2-14 per treatment group (line with 95%CI in shaded area). No significant interaction was observed ( $p=0.07$ ). Linear mixed model using treatment group, time of recording the symptoms, quadratic effect of the time of recording, interaction between treatment group, and time and interaction between treatment group and time squared as fixed effects, and intercept as random effect. **B.** Boxplot of daily lower respiratory tract symptom score over time per treatment group. The LRT total symptom score is the sum of the scores for all 5 LRT symptoms that were listed in the symptom diary and self-reported by participants once daily (see Supplementary material section S3). The score for each symptom ranged from 0 (absent) to 3 (severe). The boxes in the plots represent the interquartile range (IQR), with the median marked by a

line inside the box. The whiskers extend from the box to the minimum and maximum values. Outliers are depicted as individual points beyond the whiskers. LRT, lower respiratory tract.

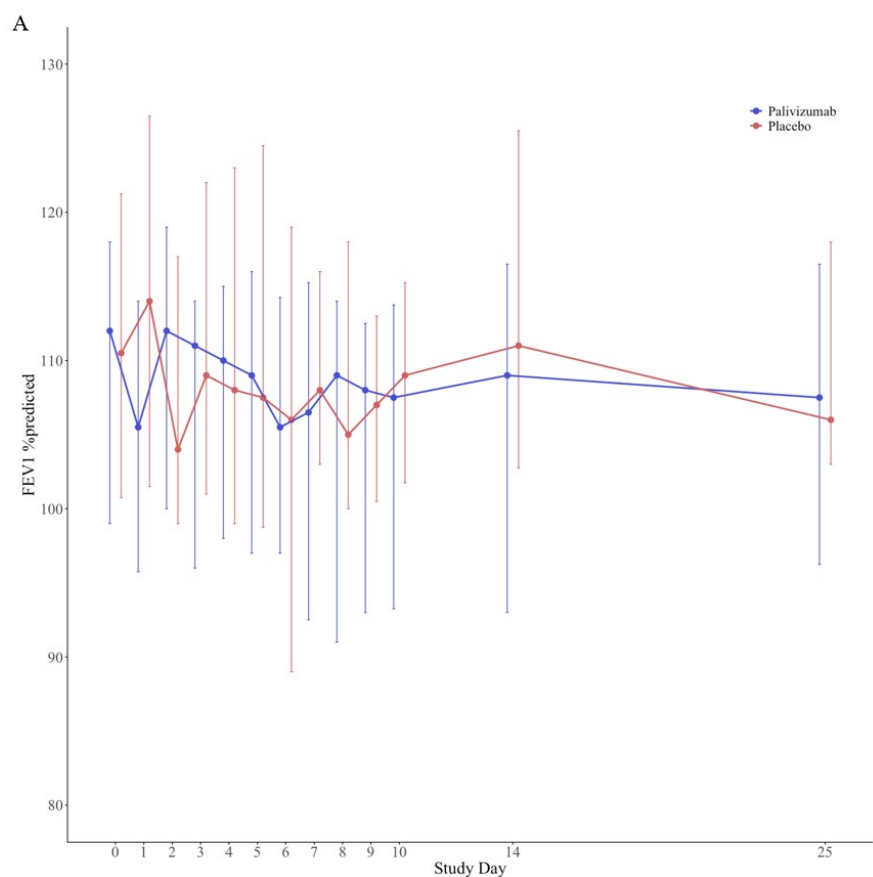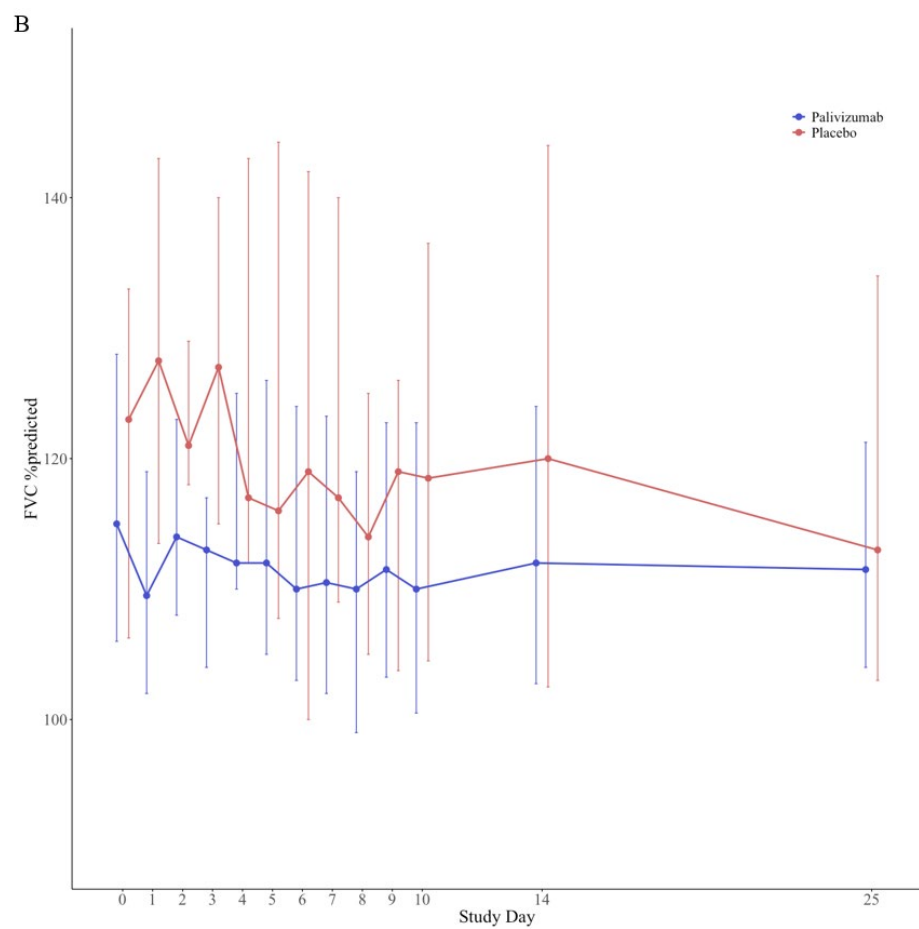

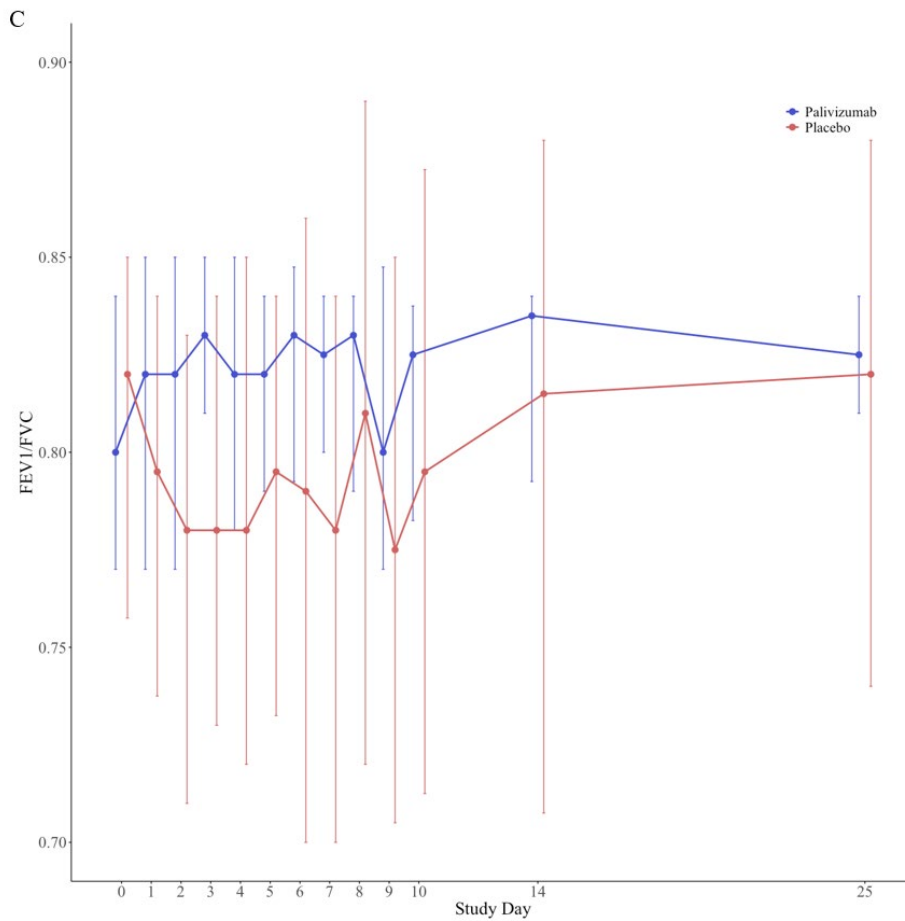

**Fig. S5. Lung function over time per treatment group**

A. FEV1 %predicted (median + IQR). FEV1 is the volume that has been exhaled at the end of the first second of forced expiration. FEV1 %predicted is the FEV1 value expressed as a percentage of the predicted value for participants age, sex, and height. **B.** FVC %predicted (median + IQR). FVC is the amount of air that can be forcibly exhaled from your lungs after taking the deepest breath possible. FVC %predicted is the FVC value expressed as a percentage of the predicted value for participants age, sex, and height. **C.** FEV1/FVC (median + IQR). Abbreviations: FEV1, forced expiratory volume; FVC, forced vital capacity.

## References

- 1 Lu, J. *et al.* Nasal delivery of broadly neutralizing antibodies protects mice from lethal challenge with SARS-CoV-2 delta and omicron variants. *Virol Sin* **37**, 238-247 (2022). <https://doi.org/10.1016/j.virs.2022.02.005>
- 2 Liu, Y. *et al.* Human monoclonal antibody F61 nasal spray effectively protected high-risk populations from SARS-CoV-2 variants during the COVID-19 pandemic from late 2022 to early 2023 in China. *Emerg Microbes Infect* **13**, 2284297 (2024). <https://doi.org/10.1080/22221751.2023.2284297>
- 3 ChiCTR. ChiCTR2200066391. A randomized, double-blind, placebo-controlled clinical study initiated by researchers to evaluate the effectiveness and safety of F61 nasal spray in preventing SARS CoV-2 infection in the population closely contacted by SARS CoV-2 infected people. (2022).
- 4 ChiCTR. ChiCTR2200066841. Phase I clinical study to evaluate the safety, tolerance and pharmacokinetics of nasal spray of recombinant human anti COVID-19 monoclonal antibody (F61 nasal spray) in Chinese healthy subjects with different doses of single and multiple nasal sprays. (2022).
- 5 Jacobino, S. R. *et al.* Human amniotic fluid antibodies protect the neonate against respiratory syncytial virus infection. *J Allergy Clin Immunol* **138**, 1477-1480 e1475 (2016). <https://doi.org/10.1016/j.jaci.2016.06.001>
- 6 Mazur, N. I. *et al.* Daily intranasal palivizumab to prevent respiratory syncytial virus infection in healthy preterm infants: a phase 1/2b randomized placebo-controlled trial. *EClinicalMedicine* **66**, 102324 (2023). <https://doi.org/10.1016/j.eclinm.2023.102324>
- 7 DutchTrialRegister. NTR7378. Safety of intranasal palivizumab in healthy adult volunteers. (2018).
- 8 DutchTrialRegister. NTR7403. Nasal administration of palivizumab to prevent RSV infection. (2018).
- 9 Halwe, S. *et al.* Intranasal Administration of a Monoclonal Neutralizing Antibody Protects Mice against SARS-CoV-2 Infection. *Viruses* **13** (2021). <https://doi.org/10.3390/v13081498>
- 10 Clinicaltrials.gov. NCT04631705. SARS-CoV-2-Neutralizing Monoclonal COVID-19 Antibody DZIF-10c by Inhalation. (2020).
- 11 Lin, Y. *et al.* Nasal Spray of Neutralizing Monoclonal Antibody 35B5 Confers Potential Prophylaxis Against Severe Acute Respiratory Syndrome Coronavirus 2 Variants of Concern: A Small-Scale Clinical Trial. *Clin Infect Dis* **76**, e336-e341 (2023). <https://doi.org/10.1093/cid/ciac448>
- 12 Ku, Z. *et al.* Nasal delivery of an IgM offers broad protection from SARS-CoV-2 variants. *Nature* **595**, 718-723 (2021). <https://doi.org/10.1038/s41586-021-03673-2>
- 13 Yerabham, A. & Ho, M. A novel IgM intranasal intervention against SARS-CoV-2. *Antib Ther* **4**, 171-174 (2021). <https://doi.org/10.1093/abt/tbab019>
- 14 Clinicaltrials.gov. NCT05184218. Evaluation of IGM-6268 in Healthy Adults and Patients With Mild to Moderate COVID-19. (2022).
- 15 Clinicaltrials.gov. NCT05160402. Evaluation of IGM-6268 in Healthy Volunteers. (2021).
- 16 Fan, W. *et al.* Nasal delivery of thermostable and broadly neutralizing antibodies protects mice against SARS-CoV-2 infection. *Signal Transduct Target Ther* **7**, 55 (2022). <https://doi.org/10.1038/s41392-022-00911-5>
- 17 Zhao, B. *et al.* Rapid development and mass production of SARS-CoV-2 neutralizing chicken egg yolk antibodies with protective efficacy in hamsters. *Biol Res* **57**, 24 (2024). <https://doi.org/10.1186/s40659-024-00508-y>
- 18 Frumkin, L. R. *et al.* Egg-Derived Anti-SARS-CoV-2 Immunoglobulin Y (IgY) With Broad Variant Activity as Intranasal Prophylaxis Against COVID-19. *Front Immunol* **13**, 899617 (2022). <https://doi.org/10.3389/fimmu.2022.899617>
- 19 Clinicaltrials.gov. NCT04567810. Safety, Tolerability, and Pharmacokinetics of Anti-Severe Acute Respiratory Syndrome Coronavirus 2 (SARS-CoV-2) Chicken Egg Antibody (IgY) (COVID-19). (2020).
- 20 Song, R. *et al.* Nasal spray of an IgM-like ACE2 fusion protein HH-120 prevents SARS-CoV-2 infection: Two investigator-initiated postexposure prophylaxis trials. *J Med Virol* **95**, e29275 (2023). <https://doi.org/10.1002/jmv.29275>
- 21 Clinicaltrials.gov. NCT05747677. A Study of HH-120 Nasal Spray in Close Contacts of Those Diagnosed With COVID-19. (2022).
- 22 Clinicaltrials.gov. NCT05765279. A Study to Assess the Efficacy of HH-120 Nasal Spray for Prevention of SARS-CoV-2 Infection in Adult Close Contacts of Individuals Infected With SARS-CoV-2. (2022).
- 23 Clinicaltrials.gov. NCT05358873. Efficacy and Safety of Nasal Spray Solution Containing Human IgG1 Anti-COVID-19 Antibody Cocktail. (2022).
- 24 Clinicaltrials.gov. NCT05977101. The Safety and Tolerability of MY-586 COVID-19 Neutralizing Antibody Nasal Spray in Healthy Subjects. (2021).
- 25 Beukenhorst, A. L. *et al.* A pan-influenza monoclonal antibody neutralizes H5 strains and prophylactically protects through intranasal administration. *Sci Rep* **14**, 3818 (2024). <https://doi.org/10.1038/s41598-024-53049-5>

- 26 Labs, L. *Leyden Labs' Intranasal PanFlu Antibody Enters the Clinic*, <<https://leydenlabs.com/20231904-news-item-intranasal-panflu-antibody-enters-the-clinic>> (2023).
- 27 Makela, A. R. *et al.* Intranasal trimeric sherpabody inhibits SARS-CoV-2 including recent immunoevasive Omicron subvariants. *Nat Commun* **14**, 1637 (2023). <https://doi.org/10.1038/s41467-023-37290-6>
- 28 Seow, H. C. *et al.* Neutralisation of SARS-CoV-2 by monoclonal antibody through dual targeting powder formulation. *J Control Release* **358**, 128-141 (2023). <https://doi.org/10.1016/j.jconrel.2023.04.029>
- 29 Jacque, E. *et al.* Hyper-Enriched Anti-RSV Immunoglobulins Nasally Administered: A Promising Approach for Respiratory Syncytial Virus Prophylaxis. *Front Immunol* **12**, 683902 (2021). <https://doi.org/10.3389/fimmu.2021.683902>
- 30 Zhang, H. *et al.* Intranasal administration of SARS-CoV-2 neutralizing human antibody prevents infection in mice. *bioRxiv* **2020.2012.2008.416677** (2020).
- 31 Houser, K. V. *et al.* Prophylaxis With a Middle East Respiratory Syndrome Coronavirus (MERS-CoV)-Specific Human Monoclonal Antibody Protects Rabbits From MERS-CoV Infection. *J Infect Dis* **213**, 1557-1561 (2016). <https://doi.org/10.1093/infdis/jiw080>
- 32 Leyva-Grado, V. H., Tan, G. S., Leon, P. E., Yondola, M. & Palese, P. Direct administration in the respiratory tract improves efficacy of broadly neutralizing anti-influenza virus monoclonal antibodies. *Antimicrob Agents Chemother* **59**, 4162-4172 (2015). <https://doi.org/10.1128/AAC.00290-15>
- 33 He, F. *et al.* Effective intranasal therapeutics and prophylactics with monoclonal antibody against lethal infection of H7N7 influenza virus. *Antiviral Res* **100**, 207-214 (2013). <https://doi.org/10.1016/j.antiviral.2013.08.003>
- 34 Ye, J. *et al.* Intranasal delivery of an IgA monoclonal antibody effective against sublethal H5N1 influenza virus infection in mice. *Clin Vaccine Immunol* **17**, 1363-1370 (2010). <https://doi.org/10.1128/CVI.00002-10>
